# Supplementary material for: Hansen Solubility Parameters Applied to the Extraction of Phytochemicals
Source: MDPI journal article supplement (doi:10.3390/plants12163008), 2023-08-21
Supplement: s1 [file s1]

## Supporting Information – Plants

### HANSEN SOLUBILITY PARAMETERS APPLIED TO THE EXTRACTION OF PHYTOCHEMICALS

*Fábio Junior Moreira Novaes<sup>1</sup>, Daliane Cláudia de Faria<sup>1</sup>, Fabio Zamboni Ferraz<sup>1</sup>,  
Francisco Radler de Aquino Neto<sup>2,\*</sup>*

<sup>1</sup> Universidade Federal de Viçosa, Departamento de Química, Avenida Peter Henry Rolfs, s/n, Campus Universitário, Viçosa, MG 36570-900, Brazil

<sup>2</sup> Universidade Federal do Rio de Janeiro, Instituto de Química, Laboratório de Apoio ao Desenvolvimento Tecnológico (LADETEC), Avenida Horácio Macedo, 1281, Polo de Química, bloco C, Rio de Janeiro, RJ 21941-598, Brazil

#### **Content:**

**S1.** Example of obtaining HSPs for the paracetamol molecule

**S2.** Example of obtaining HSPs for the salicylic acid molecule

**S3.** Other extraction techniques

## S1. Paracetamol (CAS No: 103-30-2)

In order to exemplify the use of Equations 10-13 and Tables 1-2 of the main text, **Table S1** presents the calculations for obtaining the volume ( $V_m$ ) and molar refractivity ( $R_D$ ) of paracetamol.

**Table S1.** Parameters required to estimate paracetamol  $V_m$  and  $R_D$  via Equations 10-13.

| Chemical structure                                                                 | Fragment ( $k$ )  | $n$ | $V_k$ | $\sum V_k$ | $R_k$                           | $\sum R_k$ |
|------------------------------------------------------------------------------------|-------------------|-----|-------|------------|---------------------------------|------------|
| 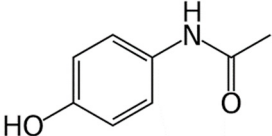 | -OH               | 1   | 11.78 | 11.78      | 2.51                            | 2.51       |
|                                                                                    | =CH- <sup>a</sup> | 4   | 13.23 | 52.92      | 4.46                            | 17.84      |
|                                                                                    | >C= <sup>a</sup>  | 2   | 0.00  | 0.00       | 3.48                            | 3.69       |
|                                                                                    | $V_6$             | 1   | 6.89  | 6.89       | -                               | -          |
|                                                                                    | $V_a$             | 1   | 1.82  | 1.82       | -                               | -          |
|                                                                                    | >NH               | 1   | 7.74  | 7.74       | 3.69                            | 3.69       |
|                                                                                    | >C=               | 1   | 0.00  | 0.00       | 3.15                            | 3.15       |
|                                                                                    | =O                | 1   | 14.89 | 14.89      | 1.84                            | 1.84       |
|                                                                                    | -CH <sub>3</sub>  | 1   | 29.58 | 29.58      | 5.74                            | 5.74       |
| <b><math>V_m = 125.62</math></b>                                                   |                   |     |       |            | <b><math>R_D = 41.73</math></b> |            |

<sup>a</sup>referring to the aromatic ring;  $n$ : number of occurrences;  $V_k$  fragment volume;  $R_k$  fragment refractivity.

The calculated molar volume (125.62) is close to the experimental value of  $120.9 \pm 3.0$  cm<sup>3</sup>/mol, as the molar refractivity. (41.27 vs.  $42.4 \pm 0.3$ ) [1], indicating that the approach put forward by Bouteloup & Mathieu [2] and Mathieu [3] are acceptable to estimate the  $V_m$  and  $R_D$ , respectively, and consequently to obtain the Hansen dispersion parameter ( $\delta_D$ ) by using Equation 10:

$$\delta_D = \sqrt{93.8 + 2016 \times \left(\frac{41.73}{125.62}\right)^2 + \frac{75044}{125.62} \times \left(\frac{41.73}{125.62}\right)^2} = 19.5$$

To calculate the sum of polar ( $E_P$ ) and hydrogen ( $E_H$ ) cohesive energies, data from Tables 3 and 4 of the main text are used, respectively, based on Equation 14. The determination of such energies is compiled in **Table S2**.

**Table S2.** Parameters required to estimate  $E_P$  and  $E_H$  of paracetamol via data from Tables 3 and 4 on Equation 14.

| Chemical structure                                                                | Fragment (k)      | n | $E_{P_k}$                       | $\sum E_{P_k}$ | $E_{H_k}$                         | $\sum E_{H_k}$ |
|-----------------------------------------------------------------------------------|-------------------|---|---------------------------------|----------------|-----------------------------------|----------------|
| 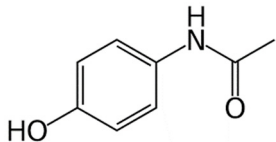 | -OH               | 1 | 4125                            | 4125           | 16945                             | 16945          |
|                                                                                   | =CH- <sup>a</sup> | 4 | -                               | -              | 24.5                              | 98             |
|                                                                                   | >C= <sup>a</sup>  | 2 | -                               | -              | -                                 | -              |
|                                                                                   | >NH               | 1 | 2783                            | 2783           | 5060                              | 5060           |
|                                                                                   | N                 | 1 | -                               | -              | 3252                              | 3252           |
|                                                                                   | >C=               | 1 | 15972                           | 15972          | -                                 | -              |
|                                                                                   | =O                | 1 | 1603                            | 1603           |                                   |                |
|                                                                                   | O                 | 2 | -                               | -              | 1980                              | 3960           |
|                                                                                   | >CH-              | 3 | -                               | -              | 24.5                              | 73.5           |
|                                                                                   |                   |   | <b><math>E_P = 24483</math></b> |                | <b><math>E_H = 29388.5</math></b> |                |

<sup>a</sup> referring to the aromatic ring; n: number of occurrences;  $E_{P_k}$  polar energy of fragment (k);  $E_{P_k}$  hydrogen bonding energy for the k fragment.

From the respective cohesion energies, the polar and hydrogen bonding HSPs are obtained using Equation 14:

$$\delta_P = \sqrt{\frac{E_P}{V_m}} = \sqrt{\frac{24483}{125.62}} = 13.96$$

$$\delta_H = \sqrt{\frac{E_H}{V_m}} = \sqrt{\frac{29388.5}{125.62}} = 15.3$$

The HSP values estimated above ( $V_m = 125.62$ ,  $\delta_D = 19.5$ ,  $\delta_P = 13.9$  e  $\delta_H = 15.3$ ) are not all equivalent to those described by Hansen (2007, p. 451:  $V_m = 151.2$ ,  $\delta_D = 17.8$ ,  $\delta_P = 10.5$ , and  $\delta_H = 13.9$ ) [4], which has a discrepant molar volume about the experimental value (120.9 cm<sup>3</sup>/mol). The cohesion energies for the Hansen data can be recalculated and the values of each parameter obtained using the experimental volume, whose new values

( $\delta_D = 19.9$ ,  $\delta_P = 11.7$ , and  $\delta_H = 15.5$ ) do approach those obtained using the methodology of Mathieu.

## S2. Salicylic acid (CAS No: 69-72-7)

An equivalent approach performed in item S1 is presented below for the determination of the volume ( $V_m$ ) and molar refractivity ( $R_D$ ) of salicylic acid (**Table S3**) and its respective HSPs (**Tabela S4**).

**Table S3.** Parameters required to estimate salicylic acid ( $V_m$  and  $R_D$ ) via Equations 10-13.

| Chemical structure                                                                  | Fragment ( <i>k</i> ) | <i>n</i> | $V_k$ | $\sum V_k$     | $R_k$         | $\sum R_k$ |
|-------------------------------------------------------------------------------------|-----------------------|----------|-------|----------------|---------------|------------|
| 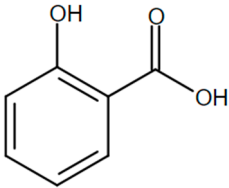 | -OH                   | 2        | 11.78 | 23.56          | 2.51          | 5.02       |
|                                                                                     | =CH- <sup>a</sup>     | 4        | 13.23 | 52.92          | 4.46          | 17.84      |
|                                                                                     | >C= <sup>a</sup>      | 2        | 0.00  | 0.00           | 3.48          | 6.69       |
|                                                                                     | $V_6$                 | 1        | 6.89  | 6.89           | -             | -          |
|                                                                                     | $V_a$                 | 1        | 1.82  | 1.82           | -             | -          |
|                                                                                     | >C=                   | 1        | 0.00  | 0.00           | 3.15          | 3.15       |
|                                                                                     | =O                    | 1        | 14.89 | 14.89          | 1.84          | 1.84       |
|                                                                                     |                       |          |       | $V_m = 100.08$ | $R_D = 34.54$ |            |

<sup>a</sup>referring to the aromatic ring; *n*: number of occurrences;  $V_k$  fragment volume;  $R_k$  fragment refractivity.

Once again, the calculated molar volume (100.08 cm<sup>3</sup>/mol) is close to the experimental value (100.4 ± 3.0 cm<sup>3</sup>/mol), as well as the molar refractivity (34.54 vs. 35.1 ± 0.3) [5], confirming the assertiveness of the Bouteloup & Mathieu [2].

$$\delta_D = \sqrt{93.8 + 2016 \times \left(\frac{34.54}{100.08}\right)^2 + \frac{75044}{100.08} \times \left(\frac{34.54}{100.08}\right)^2} = 20.6$$

**Table S4.** Parameters required to estimate  $E_P$  and  $E_H$  of salicylic acid via data from Tables 3 and 4 on Equation 14.

| Chemical structure                                                                | Fragment ( $k$ )  | $n$ | $E_P$ | $\sum E_P$ | $E_H$                           | $\sum E_H$ |
|-----------------------------------------------------------------------------------|-------------------|-----|-------|------------|---------------------------------|------------|
| 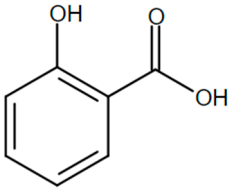 | -OH               | 2   | 4125  | 8250       | 16945                           | 33890      |
|                                                                                   | =CH- <sup>a</sup> | 4   | -     | -          | 24.5                            | 98         |
|                                                                                   | >C= <sup>a</sup>  | 2   | -     | -          | -                               | -          |
|                                                                                   | >C=               | 1   | 15972 | 15972      | -                               | -          |
|                                                                                   | =O                | 1   | 1603  | 1603       | -                               | -          |
|                                                                                   | O                 | 3   | -     | -          | 1980                            | 5940       |
| <b><math>E_P = 25825</math></b>                                                   |                   |     |       |            | <b><math>E_H = 39928</math></b> |            |

<sup>a</sup> referring to the aromatic ring;  $n$ : number of occurrences;  $E_{P_k}$  polar energy of fragment ( $k$ );  $E_{P_k}$  hydrogen bonding energy for the  $k$  fragment.

$$\delta_P = \sqrt{\frac{E_P}{V_m}} = \sqrt{\frac{25825}{100.08}} = 16.06$$

$$\delta_H = \sqrt{\frac{E_H}{V_m}} = \sqrt{\frac{39928}{100.08}} = 20.0$$

Again, the estimated HSP values for salicylic acid ( $V_m = 100.08$ ,  $\delta_D = 20.6$ ,  $\delta_P = 16.06$ , and  $\delta_H = 20.0$ ) are not all equivalent to those described by Hansen (2007, p. 463:  $V_m = 95.7$ ,  $\delta_D = 19.4$ ,  $\delta_P = 10.1$  e  $\delta_H = 17.4$ ) [4]. However, if recalculated with  $V_m = 100.1$ , one has  $\delta_D = 19.0$ ,  $\delta_P = 9.9$ , and  $\delta_H = 17.0$ , which are acceptable.

### S.3. Other extraction techniques

Other extraction techniques have been employed after HSP solvent selection in the extraction of phytochemicals (Table S5).

**Table S5.** Sampler of extraction techniques employed after HSP solvent selection for the extraction of phytochemicals.

| Analite                           | Matrix                           | Selected solvent                | HSP                        | Extraction technique | Authors |
|-----------------------------------|----------------------------------|---------------------------------|----------------------------|----------------------|---------|
| TAG                               | <i>Litsea cubeba</i> kernel oils | CPME                            | 0.43-0.44 (RED)            | Soxhlet              | [6]     |
| $\beta$ and $\gamma$ -Tocopherols |                                  |                                 | 0.76 (RED)                 |                      |         |
| $\delta$ -Tocopherol              |                                  |                                 | 0.63 (RED)                 |                      |         |
| $\beta$ -Sitosterol               |                                  |                                 | 0.61 (RED)                 |                      |         |
| Stigmasterol                      |                                  |                                 | 0.7 (RED)                  |                      |         |
| Campesterol                       |                                  |                                 | 0.61 (RED)                 |                      |         |
| Bilberry oil                      | Solid waste from bilberry seeds  | Norflurane                      | 13.81 ( $\delta_{Total}$ ) |                      | [7]     |
| $\alpha$ -Mangostin               | <i>Garcinia mangostana</i> L     | Ethyl acetate                   | 2.31 (RED)                 | Reflux               | [8]     |
|                                   |                                  | DMC                             | 2.63 (RED)                 |                      |         |
|                                   |                                  | 2-MeTHF                         | 2.19 (RED)                 |                      |         |
| $\alpha$ -Thujene                 | Blackcurrant buds                | MeTHF                           | 0.65 (RED)                 | Supercritical fluid  | [9]     |
| $\beta$ -Pinene                   |                                  |                                 | 0.87 (RED)                 |                      |         |
| $\alpha$ -Pinene                  |                                  |                                 | 0.9 (RED)                  |                      |         |
| $\beta$ -Myrcene                  |                                  |                                 | 0.78 (RED)                 |                      |         |
| $\alpha$ -Phellandrene            |                                  |                                 | 0.68 (RED)                 |                      |         |
| $\gamma$ -Terpinene               |                                  |                                 | 0.47 (RED)                 |                      |         |
| Terpinolene                       |                                  |                                 | 0.63 (RED)                 |                      |         |
| Mangiferin                        | Mango seed kernel oil            | Ethanol:ethyl acetate 50:50 v/v | 9.7 (Ra)                   | Pressurized-liquid   | [10]    |

## References

1. ChemSpider: Paracetamol. Available online: <http://www.chemspider.com/Chemical-Structure.1906.html> (accessed on 02/02/2023).
2. Bouteloup, R.; Mathieu, D. Improved model for the refractive index: application to potential components of ambient aerosol. *Phys. Chem. Chem. Phys.*, **2018**, *20*, 22017–22026.
3. Mathieu, D. Pencil and Paper Estimation of Hansen Solubility Parameters. *ASC Omega*, **2018**, *3*, 17049-17056.
4. Hansen, C.M. Hansen Solubility Parameters: A User's Handbook, 2nd ed.; CRC Press: Taylor & Francis Group: Boca Raton, USA, 2007.
5. ChemSpider: Salicylic acid. Available online: <http://www.chemspider.com/Chemical-Structure.331.html> (accessed on 02/02/2023).
6. Zhuang, X.; Zhang, Z.; Wang, Y.; Li, Y. The effect of alternative solvents to n-hexane on the green extraction of Litsea cubeba kernel oils as new oil sources. *Ind. Crops Prod.*, **2018**, *126*, 340-346.
7. Cante, R. C.; Prisco, I.; Garella, I.; Gallo, M.; Nigro, R. Extracting the lipid fraction from waste bilberry seeds with a hydrofluorocarbon solvent. *Chem. Eng. Res. Des.*, **2020**, *157*, 174-181.
8. Bundeasomchok, K.; Filly, A.; Rakotomanomana, N.; Panichayupakaranant, P.; Chemat, F. Extraction of  $\alpha$ -mangostin from *Garcinia mangostana* L. using alternative solvents: Computational predictive and experimental studies. *LWT*, **2016**, *65*, 297-303.
9. Filly, A.; Fabiano-Tixier, A. S.; Lemasson, Y.; Roy, C.; Fernandez, X.; Chemat, F. Extraction of aroma compounds in blackcurrant buds by alternative solvents: Theoretical and experimental solubility study. *C.R. Chim.*, **2014**, *17*(12), 1268-1275.
10. Ballesteros-Vivas, D.; Álvarez-Rivera, G.; Morantes, S. J.; del Pilar Sánchez-Camargo, A.; Ibáñez, E.; Parada-Alfonso, F.; Cifuentes, A. An integrated approach for the valorization of mango seed kernel: Efficient extraction solvent selection, phytochemical profiling and antiproliferative activity assessment. *Food Res. Int.*, **2019**, *126*, 108616.
